# Supplementary material for: Kleeb Bua Daeng, a Thai Traditional Herbal Formula, Ameliorated Unpredictable Chronic Mild Stress-Induced Cognitive Impairment in ICR Mice
Source: PubMed Central journal article supplement (PMC6943511; doi:10.3390/molecules24244587), 2019-12-14

## Supplementary Materials

# Kleeb Bua Daeng, a Thai Traditional Herbal Formula, Ameliorated Unpredictable Chronic Mild Stress-Induced Cognitive Impairment in ICR Mice

Juthamart Maneenet <sup>1,2</sup>, Supawadee Daodee <sup>2</sup>, Orawan Monthakantirat <sup>2</sup>, Chantana Boonyarat <sup>2</sup>, Charinya Khamphukdee <sup>2</sup>, Pakakrong Kwankhao <sup>3</sup>, Supaporn Pitiporn <sup>3</sup>, Suresh Awale <sup>4</sup>, Yaowared Chulikhit <sup>2,\*</sup> and Anake Kijjoa <sup>5,\*</sup>

<sup>1</sup> Graduate School of Pharmaceutical Sciences, Khon Kaen University, Khon Kaen 40002, Thailand; juthamart\_pp@hotmail.com (J.M.)

<sup>2</sup> Division of Pharmaceutical Chemistry, Faculty of Pharmaceutical Sciences, Khon Kaen University, Khon Kaen 40002, Thailand; csupawad@kku.ac.th (S.D.); oramon@kku.ac.th (O.M.); chaboo@kku.ac.th (C.B.); charkh@kku.ac.th (C.K.)

<sup>3</sup> Department of Pharmacy, Chao Phya Abhaibhubejhr Hospital, Ministry of Public Health, Prachinburi, Thailand 25000, Thailand; pakakrong2@gmail.com (P.K.); spitiporn@yahoo.com (S.P.)

<sup>4</sup> Division of Natural Drug Discovery, Institute of Natural Medicine, University of Toyama, 2630 Sugitani, Toyama 930-0194, Japan; suresh@inm.u-toyama.ac.jp

<sup>5</sup> ICBAS-Instituto de Ciências Biomédicas Abel Salazar and CIIMAR, Rua de Jorge Viterbo Ferreira, 228, 4050-313 Porto, Portugal

\* Correspondence: yaosum@kku.ac.th (Y.C.); ankijjoa@icbas.up.pt (A.K.), Tel.: +351-22042-8331 (A.K.)

### 1. Statistical analysis of KBD on Unpredictable Chronic Mild Stress (UCMS)-Induced Cognitive Impairment.

**Table S1.** One-way analysis of variance (ANOVA) test of the Y-maze test.

| Group comparison                                | ANOVA followed by Tukey's post hoc test |                                                           |
|-------------------------------------------------|-----------------------------------------|-----------------------------------------------------------|
|                                                 | P                                       | F (DF <sub>between group</sub> , DF <sub>residual</sub> ) |
| non-stress group VS. vehicle-treated UCMS group | <0.001                                  | F(4,43)=8.973                                             |
| vehicle-treated UCMS group VS. UCMS+Vit E100    | 0.019                                   |                                                           |
| vehicle-treated UCMS group VS. UCMS+KBD100      | 0.121                                   |                                                           |
| vehicle-treated UCMS group VS. UCMS+KBD500      | <0.001                                  |                                                           |
| UCMS+KBD100 VS. UCMS+KBD500                     | 0.015                                   |                                                           |

**Table S2.** One-way analysis of variance (ANOVA) of the Novel Object Recognition Test (NORT).

| Group comparison                                | ANOVA followed by Tukey's post hoc test |                                                           |
|-------------------------------------------------|-----------------------------------------|-----------------------------------------------------------|
|                                                 | P                                       | F (DF <sub>between group</sub> , DF <sub>residual</sub> ) |
| non-stress group VS. vehicle-treated UCMS group | 0.002                                   | F(4,41)=7.77                                              |
| vehicle-treated UCMS group VS. UCMS+Vit E100    | 0.002                                   |                                                           |
| vehicle-treated UCMS group VS. UCMS+KBD100      | 0.006                                   |                                                           |
| vehicle-treated UCMS group VS. UCMS+KBD500      | <0.001                                  |                                                           |

**Table S3.** T-test of time exploring object (comparison between the new object and the familiar object).

| Group comparison                                                           | t-test  |         |        |
|----------------------------------------------------------------------------|---------|---------|--------|
|                                                                            | t       | Df      | P      |
| non-stress group (familiar) VS. non-stress group (new)                     | -16.299 | -26.299 | <0.001 |
| vehicle-treated UCMS group (familiar) VS. vehicle-treated UCMS group (new) | -1.046  | -4.261  | 0.313  |
| UCMS+Vit E100 (familiar) VS. UCMS+Vit E100 (new)                           | -11.486 | -25.471 | <0.001 |
| UCMS+KBD100 (familiar) VS. UCMS+KBD100 (new)                               | -2.925  | -6.689  | 0.011  |
| UCMS+KBD500 (familiar) VS. UCMS+KBD500 (new)                               | -4.595  | -18.031 | <0.001 |

### 2. Statistical analysis of the KBD extract on UCMS-Induced hypersecretion of serum corticosterone.

**Table S4.** One-way analysis of variance (ANOVA) test of serum corticosterone (CORT) levels.

| Group comparison                                | ANOVA followed by Tukey's post hoc test |                                                           |
|-------------------------------------------------|-----------------------------------------|-----------------------------------------------------------|
|                                                 | P                                       | F (DF <sub>between group</sub> , DF <sub>residual</sub> ) |
| non-stress group VS. vehicle-treated UCMS group | <0.001                                  | F(4,10)=16.047                                            |
| vehicle-treated UCMS group VS. UCMS+Vit E100    | 0.003                                   |                                                           |
| vehicle-treated UCMS group VS. UCMS+KBD100      | 0.004                                   |                                                           |
| vehicle-treated UCMS group VS. UCMS+KBD500      | <0.001                                  |                                                           |

### 3. Statistical analysis of KBD on the UCMS-Induced lipid peroxidation.

**Table S5.** One-way analysis of variance (ANOVA) test of the lipid peroxidation in the frontal cortex.

| Group comparison                                | ANOVA followed by Tukey's post hoc test |                                                           |
|-------------------------------------------------|-----------------------------------------|-----------------------------------------------------------|
|                                                 | P                                       | F (DF <sub>between group</sub> , DF <sub>residual</sub> ) |
| non-stress group VS. vehicle-treated UCMS group | <0.001                                  | F(4,17)=525.556                                           |
| vehicle-treated UCMS group VS. UCMS+Vit E100    | <0.001                                  |                                                           |
| vehicle-treated UCMS group VS. UCMS+KBD100      | <0.001                                  |                                                           |
| vehicle-treated UCMS group VS. UCMS+KBD500      | <0.001                                  |                                                           |

**Table S6.** One-way analysis of variance (ANOVA) test of lipid peroxidation in the hippocampus.

| Group comparison                                | ANOVA followed by Tukey's post hoc test |                                                           |
|-------------------------------------------------|-----------------------------------------|-----------------------------------------------------------|
|                                                 | P                                       | F (DF <sub>between group</sub> , DF <sub>residual</sub> ) |
| non-stress group VS. vehicle-treated UCMS group | <0.001                                  | F(4,16)=32.222                                            |
| vehicle-treated UCMS group VS. UCMS+Vit E100    | <0.001                                  |                                                           |
| vehicle-treated UCMS group VS. UCMS+KBD100      | <0.001                                  |                                                           |
| vehicle-treated UCMS group VS. UCMS+KBD500      | <0.001                                  |                                                           |

### 4. Statistical analysis of KBD on the UCMS-Induced Oxidative Stress in the Brain.

**Table S7.** One-way analysis of variance (ANOVA) test of the catalase activity in the frontal cortex

| Group comparison                                | ANOVA followed by Tukey's post hoc test |                                                           |
|-------------------------------------------------|-----------------------------------------|-----------------------------------------------------------|
|                                                 | P                                       | F (DF <sub>between group</sub> , DF <sub>residual</sub> ) |
| non-stress group VS. vehicle-treated UCMS group | 0.006                                   | F(4,14)=6.275                                             |
| vehicle-treated UCMS group VS. UCMS+Vit E100    | 0.046                                   |                                                           |
| vehicle-treated UCMS group VS. UCMS+KBD100      | 0.99                                    |                                                           |
| vehicle-treated UCMS group VS. UCMS+KBD500      | 0.048                                   |                                                           |

**Table S8.** One-way analysis of variance (ANOVA) test of the catalase activity in the hippocampus

| Group comparison                                | ANOVA followed by Tukey's post hoc test |                                                           |
|-------------------------------------------------|-----------------------------------------|-----------------------------------------------------------|
|                                                 | P                                       | F (DF <sub>between group</sub> , DF <sub>residual</sub> ) |
| non-stress group VS. vehicle-treated UCMS group | 0.02                                    | F(4,13)=7.538                                             |
| vehicle-treated UCMS group VS. UCMS+Vit E100    | <0.001                                  |                                                           |
| vehicle-treated UCMS group VS. UCMS+KBD100      | 0.998                                   |                                                           |
| vehicle-treated UCMS group VS. UCMS+KBD500      | 0.004                                   |                                                           |

**Table S9.** One-way analysis of variance (ANOVA) test of the superoxide dismutase (SOD) activity in the frontal cortex.

| Group comparison                                | ANOVA followed by Tukey's post hoc test |                                                                  |
|-------------------------------------------------|-----------------------------------------|------------------------------------------------------------------|
|                                                 | <i>P</i>                                | <i>F</i> (DF <sub>between group</sub> , DF <sub>residual</sub> ) |
| non-stress group VS. vehicle-treated UCMS group | <0.001                                  | F(4,14)=17.385                                                   |
| vehicle-treated UCMS group VS. UCMS+Vit E100    | <0.001                                  |                                                                  |
| vehicle-treated UCMS group VS. UCMS+KBD100      | 0.996                                   |                                                                  |
| vehicle-treated UCMS group VS. UCMS+KBD500      | <0.001                                  |                                                                  |
| UCMS+KBD100 VS. UCMS+KBD500                     | <0.001                                  |                                                                  |

**Table S10.** One-way analysis of variance (ANOVA) test of the SOD activity in the hippocampus.

| Group comparison                                | ANOVA followed by Tukey's post hoc test |                                                                  |
|-------------------------------------------------|-----------------------------------------|------------------------------------------------------------------|
|                                                 | <i>P</i>                                | <i>F</i> (DF <sub>between group</sub> , DF <sub>residual</sub> ) |
| non-stress group VS. vehicle-treated UCMS group | <0.001                                  | F(4,15)=21.732                                                   |
| vehicle-treated UCMS group VS. UCMS+Vit E100    | <0.001                                  |                                                                  |
| vehicle-treated UCMS group VS. UCMS+KBD100      | 0.997                                   |                                                                  |
| vehicle-treated UCMS group VS. UCMS+KBD500      | <0.001                                  |                                                                  |
| UCMS+KBD100 VS. UCMS+KBD500                     | <0.001                                  |                                                                  |

**Table S11.** Validation results of the analytical method for determination of piperine (1), madecassoside (2), asiaticoside (3), ferulic acid (9), luteolin-7-*O*-glucoside (8), rutin (7), kaempferol-3-glucoside (6), quercetin (4) and kaempferol (5) content in the KBD extract.

| Parameter                                   | Compounds                    |                             |                             |                             |                                 |                             |                             |                             |                             |
|---------------------------------------------|------------------------------|-----------------------------|-----------------------------|-----------------------------|---------------------------------|-----------------------------|-----------------------------|-----------------------------|-----------------------------|
|                                             | Piperine                     | Madecassoside               | Asiaticoside                | Ferulic acid                | Luteolin-7- <i>O</i> -glucoside | Rutin                       | Kaempferol-3-glucoside      | Quercetin                   | Kaempferol                  |
| <b>Linearity</b>                            |                              |                             |                             |                             |                                 |                             |                             |                             |                             |
| Range (µg/mL)                               | 5-100                        | 5-30                        | 5-30                        | 1-6                         | 1-6                             | 1-6                         | 1-6                         | 1-6                         | 1-6                         |
| Coefficient Determination (R <sup>2</sup> ) | 0.9994 ± 0.002               | 0.9937 ± 0.001              | 0.9917 ± 0.004              | 0.9984 ± 0.001              | 0.9988 ± 0.001                  | 0.9951 ± 0.002              | 0.9958 ± 0.003              | 0.9901 ± 0.001              | 0.9938 ± 0.005              |
| LOD (µg/mL)                                 | 0.05<br>(SN ~ 3.417 ± 0.545) | 2.5<br>(SN ~ 2.814 ± 0.986) | 2.5<br>(SN ~ 3.129 ± 0.150) | 0.5<br>(SN ~ 3.206 ± 0.714) | 0.5<br>(SN ~ 4.284 ± 0.434)     | 0.5<br>(SN ~ 4.027 ± 0.348) | 0.5<br>(SN ~ 4.453 ± 1.240) | 0.5<br>(SN ~ 3.976 ± 0.551) | 0.5<br>(SN ~ 3.814 ± 0.277) |
| LOQ (µg/mL)                                 | 0.1<br>(SN ~ 10.175 ± 2.300) | 5<br>(SN ~ 10.643 ± 0.098)  | 5<br>(SN ~ 10.400 ± 0.129)  | 1<br>(SN ~ 11.051 ± 1.737)  | 1<br>(SN ~ 12.853 ± 1.303)      | 1<br>(SN ~ 12.086 ± 1.044)  | 1<br>(SN ~ 11.930 ± 2.272)  | 1<br>(SN ~ 11.927 ± 1.652)  | 1<br>(SN ~ 11.443 ± 0.826)  |
| <b>Precision</b> (%RSD)                     |                              |                             |                             |                             |                                 |                             |                             |                             |                             |
| Within day                                  | 0.719 - 2.710                | 0.698 - 1.594               | 0.620 - 1.728               | 0.420 - 1.386               | 0.598 - 1.985                   | 0.009 - 1.400               | 0.531 - 1.944               | 0.141 - 1.616               | 0.616 - 3.761               |
| Between day                                 | 0.828 - 5.012                | 0.978 - 2.700               | 1.110 - 3.000               | 1.228 - 3.464               | 0.749 - 5.765                   | 1.789 - 6.725               | 2.197 - 5.553               | 2.127 - 4.123               | 0.299 - 4.892               |
| <b>Accuracy</b> (%)                         |                              |                             |                             |                             |                                 |                             |                             |                             |                             |
| Conc. (Low)                                 | 96.243 ± 0.061               | 92.704 ± 6.252              | 101.436 ± 4.525             | 99.728 ± 0.812              | 100.233 ± 6.294                 | 109.538 ± 2.776             | 106.655 ± 4.296             | 106.232 ± 4.420             | 104.835 ± 3.582             |

| Recovery | Conc.<br>(Medium) | 102.091 ± 0.387 | 99.533 ± 2.469  | 97.377 ± 1.570 | 98.778 ± 3.529  | 100.429 ± 4.888 | 96.342 ± 3.207  | 98.940 ± 3.481  | 96.507 ± 10.665 | 94.153 ± 4.930  |
|----------|-------------------|-----------------|-----------------|----------------|-----------------|-----------------|-----------------|-----------------|-----------------|-----------------|
|          | Conc.<br>(High)   | 100.693 ± 2.697 | 103.564 ± 3.076 | 97.584 ± 0.464 | 100.732 ± 2.034 | 99.324 ± 1.880  | 102.049 ± 1.789 | 101.893 ± 4.849 | 102.726 ± 5.254 | 104.734 ± 2.941 |

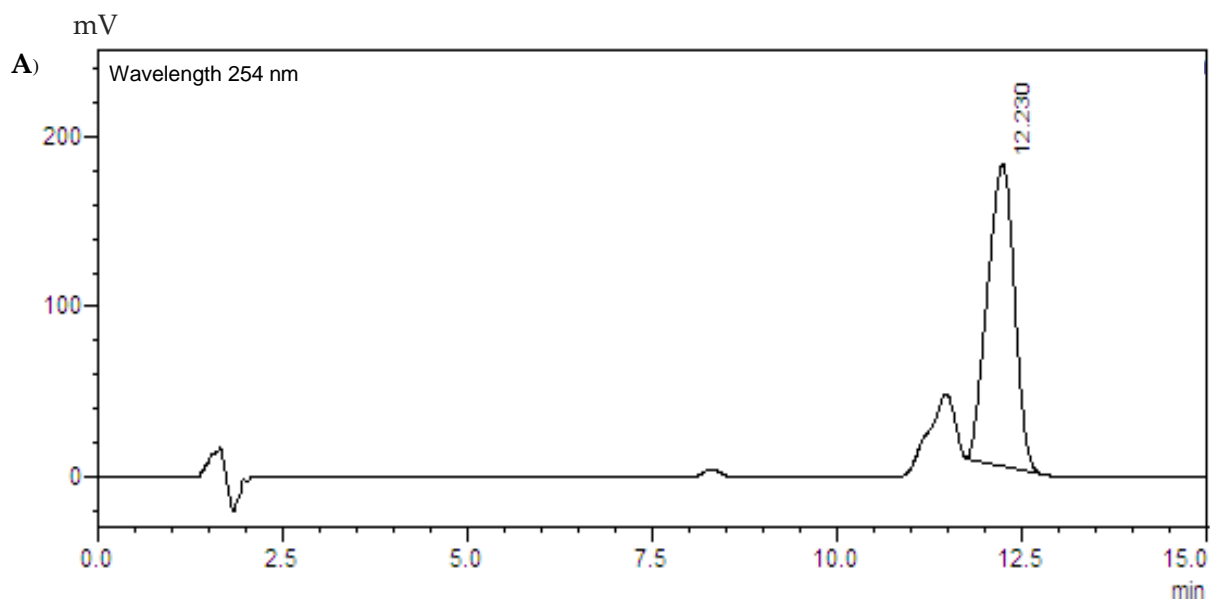

Figure S1. HPLC chromatograms of piperine solution (A) and the KBD extract (B).

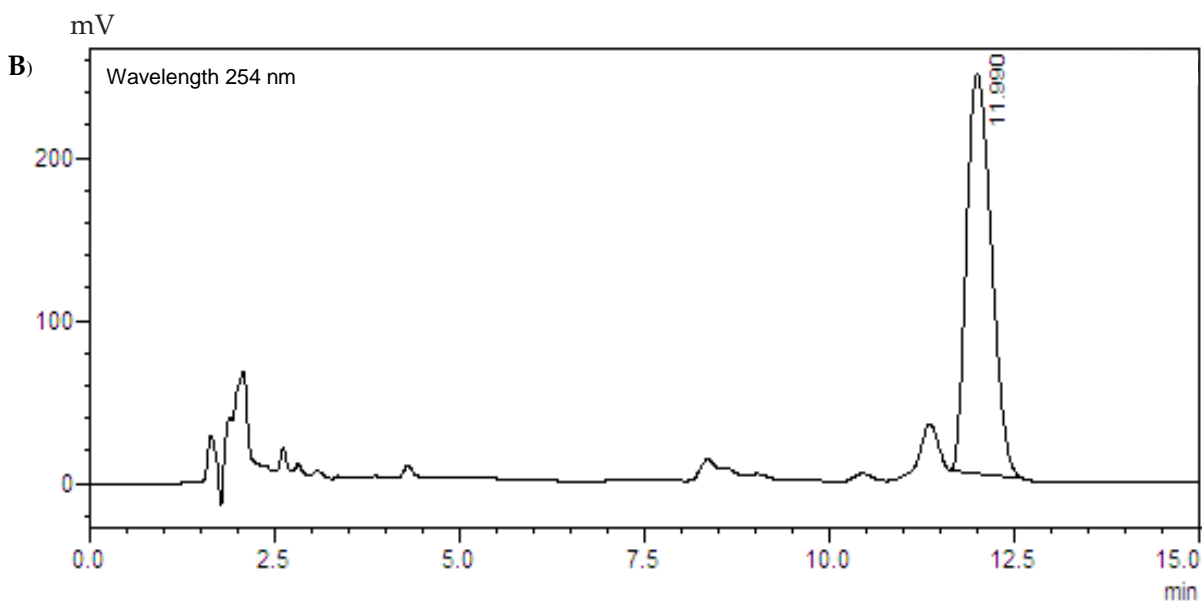

Figure S2. HPLC chromatograms of madecassoside and asiaticoside solution (A) and the KBD extract (B).

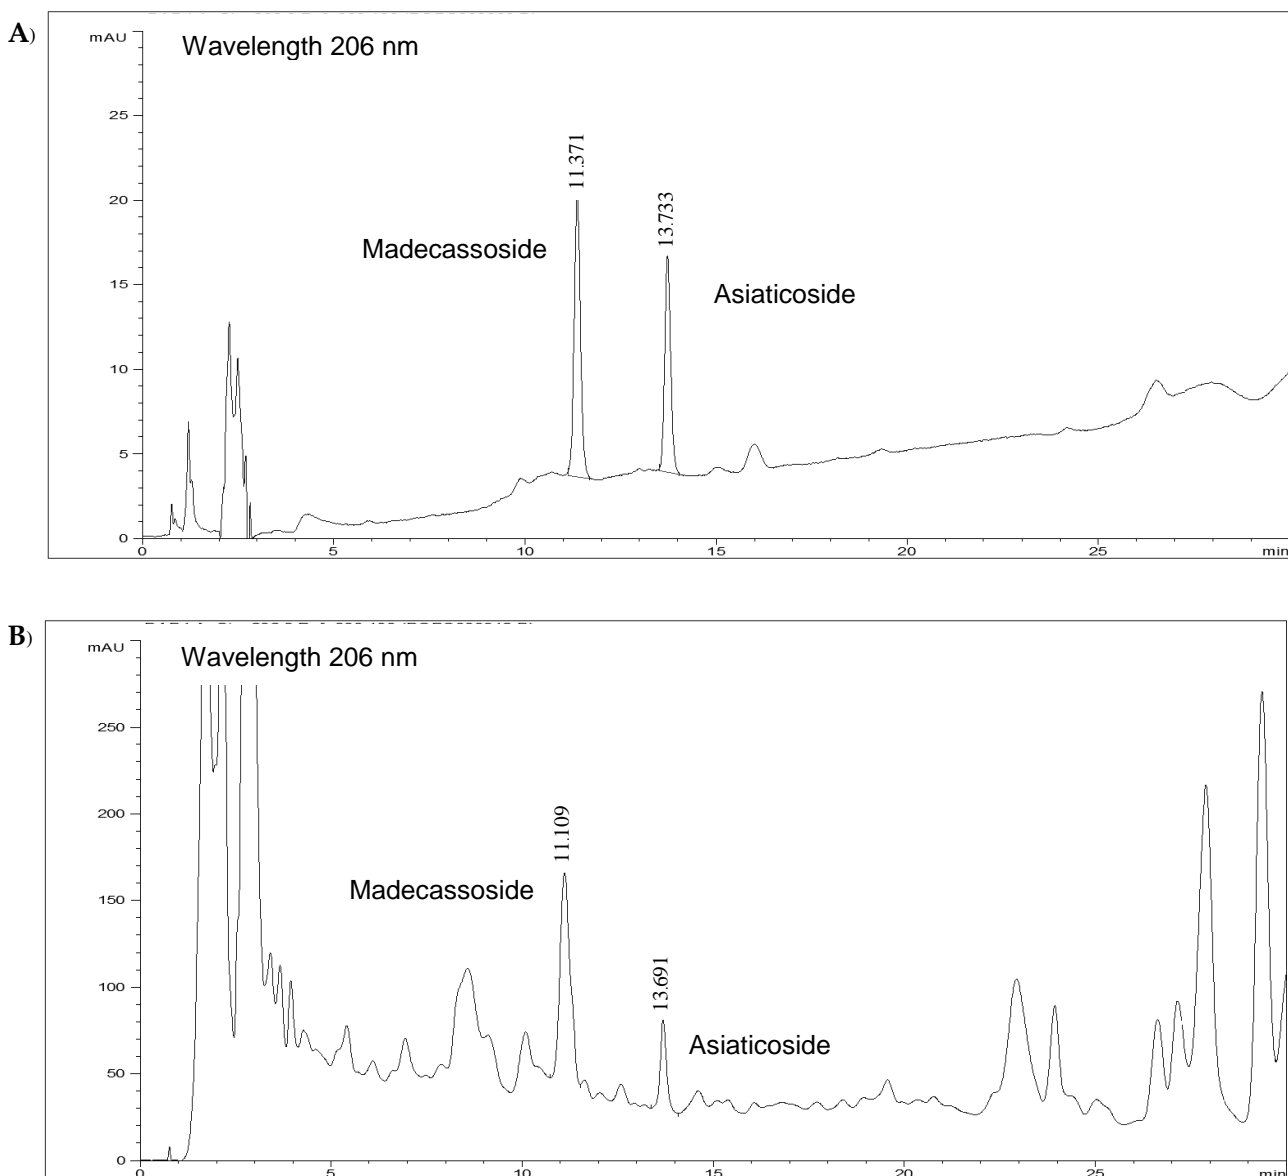

**Figure S3.** HPLC chromatograms of six standards solution (**A**) and the KBD extract (**B**) (1 = ferulic acid, 2 = luteolin-7-*O*-glucoside, 3 = rutin, 4 = kaempferol-3-glucoside, 5 = quercetin, 6 = kaempferol).

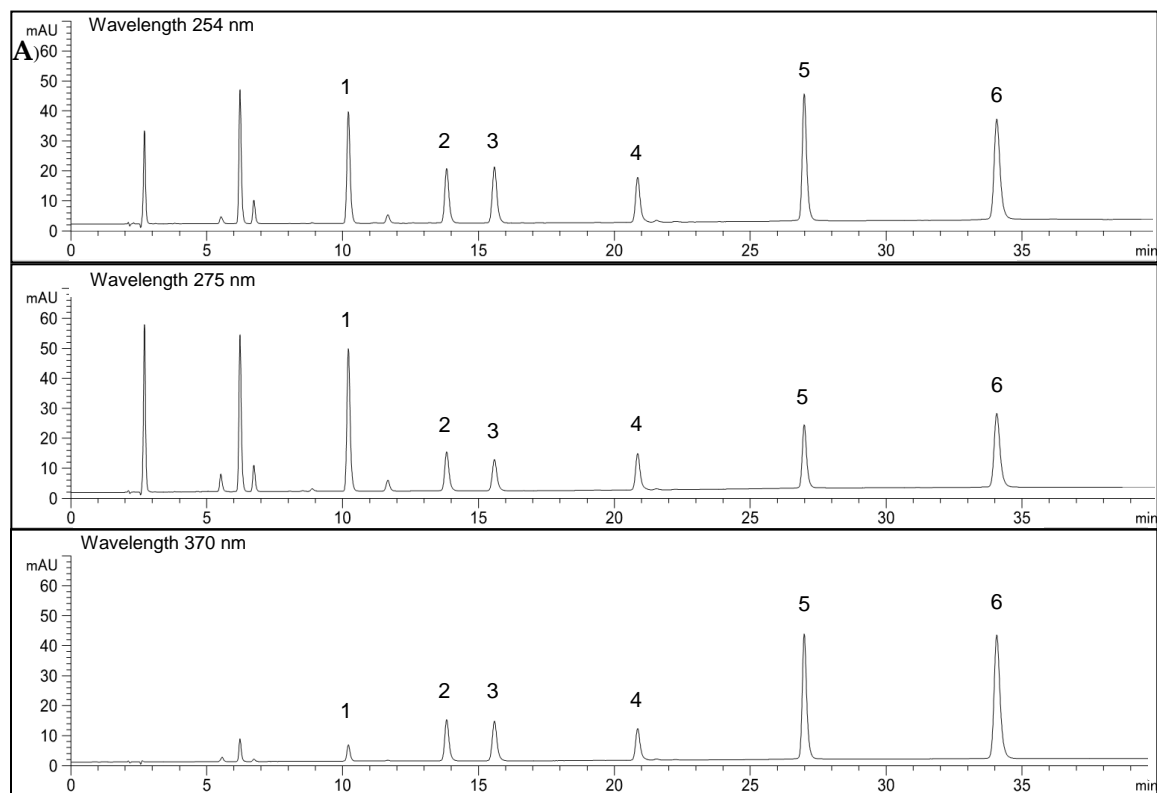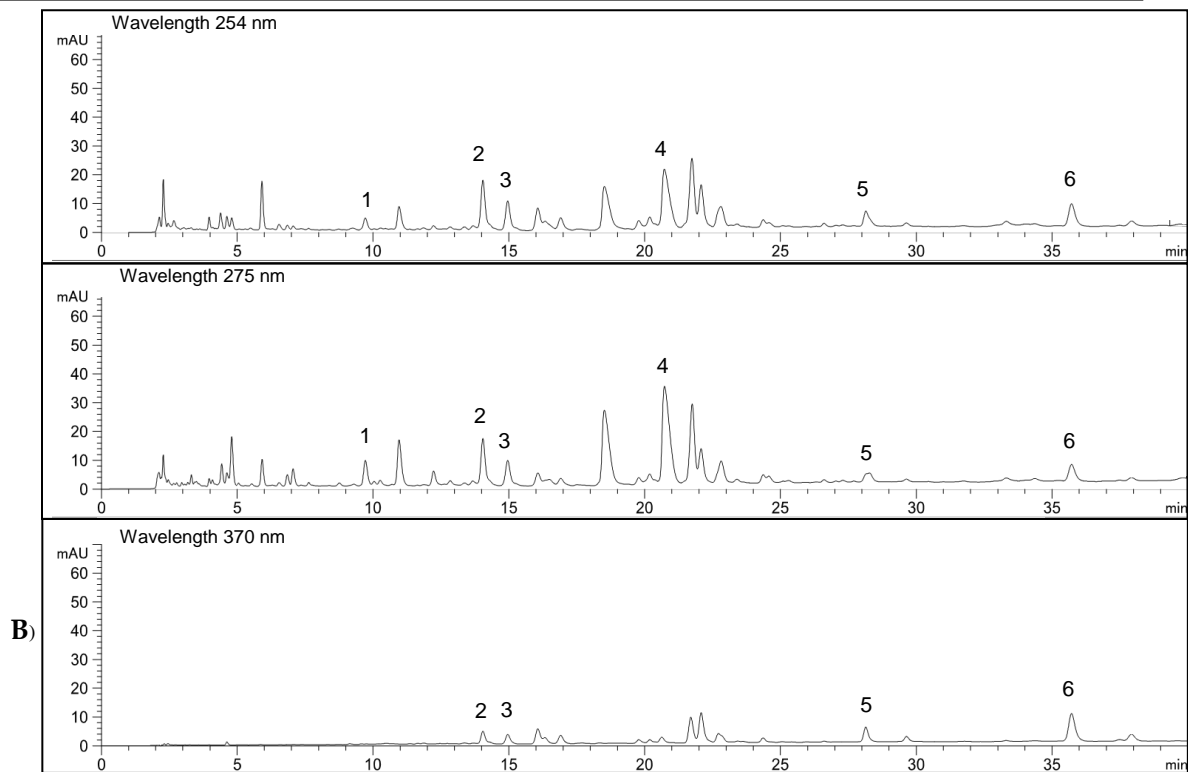

Supplement: molecules-24-04587-s001.pdf [file molecules-24-04587-s001.pdf]
